# Supplementary material for: Similarities within a multi-model ensemble: functional data analysis framework
Source: Copernicus journal article supplement (doi:10.5194/gmd-12-735-2019), 2019-02-19
Supplement: Supplementary file 1 [file gmd-12-735-2019-supplement.zip]

Archive with 3 entries (3 files):
- gmd-12-735-2019-supplement-title-page.pdf
- Supplement1.zip
- Supplement2.pdf
