# Supplementary material for: Similarities within a multi-model ensemble: functional data analysis framework
Source: Copernicus journal article supplement (doi:10.5194/gmd-12-735-2019), 2019-02-19
Supplement: Supplementary file 1 [file gmd-12-735-2019-supplement.zip › gmd-12-735-2019-supplement-title-page.pdf]

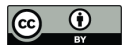

*Supplement of*

## **Similarities within a multi-model ensemble: functional data analysis framework**

**Eva Holtanová et al.**

*Correspondence to:* Eva Holtanová ([eva.holtanova@mff.cuni.cz](mailto:eva.holtanova@mff.cuni.cz))

- [gmd-12-735-2019-supplement-title-page.pdf](#)
- [Supplement1.zip](#)
- [Supplement2.pdf](#)

The copyright of individual parts of the supplement might differ from the CC BY 4.0 License.
